# Supplementary material for: Impact of space charge polarization on light-soaking phenomena in non-fullerene organic solar cells
Source: Royal Society of Chemistry journal article supplement (doi:10.1039/d1tc00574j), 2021-01-01
Supplement: d1tc00574j1.pdf [file d1tc00574j1.pdf]

## **Electronic Supplementary Information**

### **The Impact of Space Charge Polarization on Light-soaking Phenomena in Non-Fullerene Organic Solar Cells**

Yichuan Si, Yuan Xie, Sha Liu, Quanbin Liang\*, Hongbin Wu\*

Institute of Polymer Optoelectronic Materials and Devices, State Key Laboratory of  
Luminescent Materials and Devices, South China University of Technology,  
Guangzhou, 510640, P. R. China.

\*E-mail: [liangqb@scut.edu.cn](mailto:liangqb@scut.edu.cn), [hbwu@scut.edu.cn](mailto:hbwu@scut.edu.cn)

## 1. Experiment details

### 1.1 Materials

The electron donors and acceptors used in this study are poly[(2,6-(4,8-bis(5-(2-ethylhexyl)thiophen-2-yl)-benzo[1,2-b:4,5-b']dithiophene))-alt-(5,5-(1',3'-di-2-thienyl-5',7'-bis(2-ethylhexyl)benzo[1',2'-c:4',5'-c']dithiophene-4,8-dione)] (PBDB-T)<sup>17</sup>, poly [[4,8-bis[(2-ethylhexyl)oxy]benzo[1,2-b:4,5-b'] dithiophene-2,6-diyl][3-fluoro-2-[(2-ethylhexyl)carbonyl]thieno[3,4-b]thiophenediyl]] (PTB7)<sup>18</sup>, poly[(2,6-(4,8-bis(5-(2-ethylhexyl-3-fluoro)thiophen-2-yl)-benzo[1,2-b:4, 5-b']dithiophene))-alt-(5,5-(1',3'-di-2-thienyl-5',7'-bis(2-ethylhexyl)benzo[1',2'-c:4',5'-c']dithiophene-4,8-dione)] (PBDB-T-F or PM6)<sup>19</sup>, 3,9-bis(2-methylene-((3-(1,1-dicyanomethylene)-6/7-methyl)-indanone))-5,5,11,11-tetrakis(4-hexylphenyl)-dithieno[2,3-d:2',3'-d']-s-indaceno[1,2-b:5,6-b']dithiophen(IT-M)<sup>17</sup>,2,2'-((2Z,2'Z)-((12,13-bis(2-ethylhexyl)-3,9-diundecyl-12,13-dihydro-[1,2,5]thiadiazolo[3,4-e]thieno[2'',3'':4',5']thieno[2',3':4,5]pyrrolo[3,2-g]thieno[2',3':4,5]thieno[3,2-b]indole-2,10-diyl)bis(methanylylidene))bis(5,6-difluoro-3-oxo-2,3-dihydro-1H-indene-2,1-diylidene))dimalononitrile (Y6 or BTP-4F)<sup>20</sup> respectively. PBDB-T and IT-M were purchased from Organ tec. PC<sub>71</sub>BM was purchased from Han shang. PTB7 and Y6 were obtained from 1-materials. PM6 was purchased from Solarmer. 1-Chloronaphthalene, 1,8-Diiodooctane, Zinc acetate, 2-methoxyethanol, ethanolamine and MoO<sub>3</sub> were purchased from Sigma-Aldrich. All of the chemicals were used as received without further purification.

## 1.2 Device fabrication

The device structure was either in conventional configuration: glass/ITO/PEDOT:PSS (40 nm)/active layer (100 nm)/Ca (or PDINO)/Ag (100 nm) or an inverted type: glass/ITO/ZnO (30 nm)/active layer (100 nm)/MoO<sub>3</sub>(10 nm)/Ag(100 nm). For dielectric measurement, a device structure of ITO/active layer (100 nm)/Ag was used. ITO glass substrates were cleaned with isopropanol, de-ionized water and isopropanol successively and ultrasonicated for 15 min, respectively. Sol-gel ZnO solution was prepared by mixing zinc acetate (1 g), 2-methoxyethanol (10 ml) and ethanolamine (280  $\mu$ l) together in sequence, followed by heating at 60°C and stirring overnight. ZnO layer was prepared on the ITO substrate following well-established procedure<sup>21</sup>, followed by post-treatment of thermal annealing 200°C for 1h. The active blend layer was deposited by spin-coating blends of PBDB-T:IT-M (D:A=1:1, 20 mg/ml in total, 1% DIO), PBDB-T:PC<sub>71</sub>BM (D:A=1:1, 20mg/ml in total, 3% DIO), PTB7:PC<sub>71</sub>BM (D:A=1:1.5, 25 mg/ml in total, 3% DIO) chlorobenzene (CB) solution, and PM6:Y6 (D:A=1:1.2, 16 mg/ml in total, 0.3% CN) chloroform (CF) solution, respectively. The PM6:Y6 layer was thermal annealed at 110°C for 15 min. Finally, a 10 nm MoO<sub>3</sub> layer and a 100 nm Ag layer were deposited on the active layer under  $5 \times 10^{-4}$  Pa by thermal evaporation through a shadow mask (5.7 mm<sup>2</sup>) for the inverted devices, while a 10 nm Ca layer and a 100 nm Ag cathode were thermally evaporated for the conventional devices. All devices were encapsulated with UV-curable epoxy resin (ELC-2500, Electro-Lite Corp.) and a

cover glass plate for testing in a nitrogen-filled glovebox before testing.

## 2. Figure

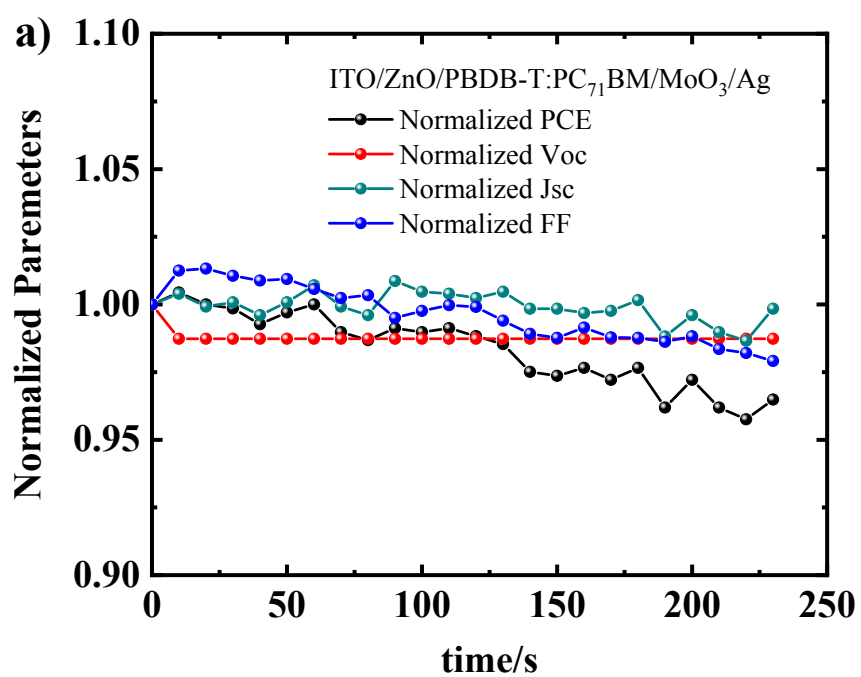

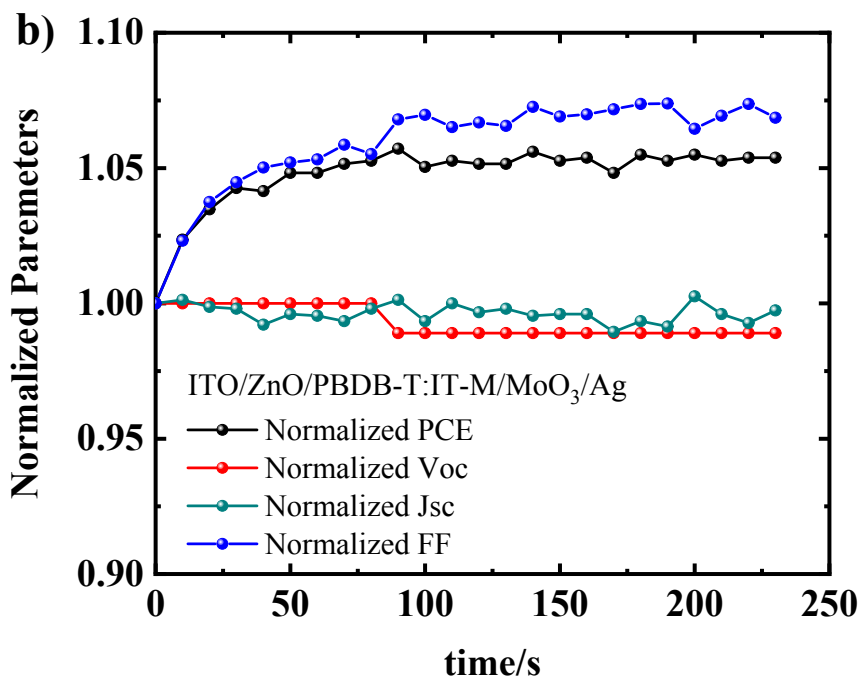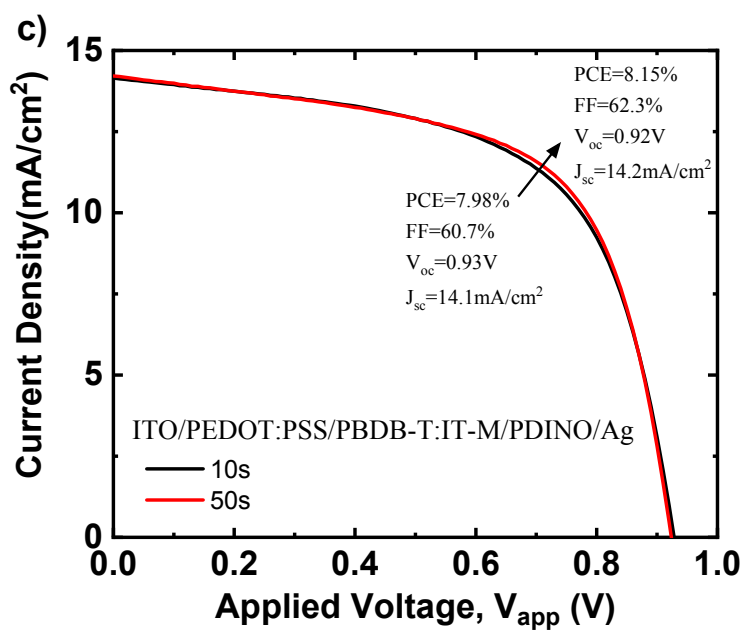

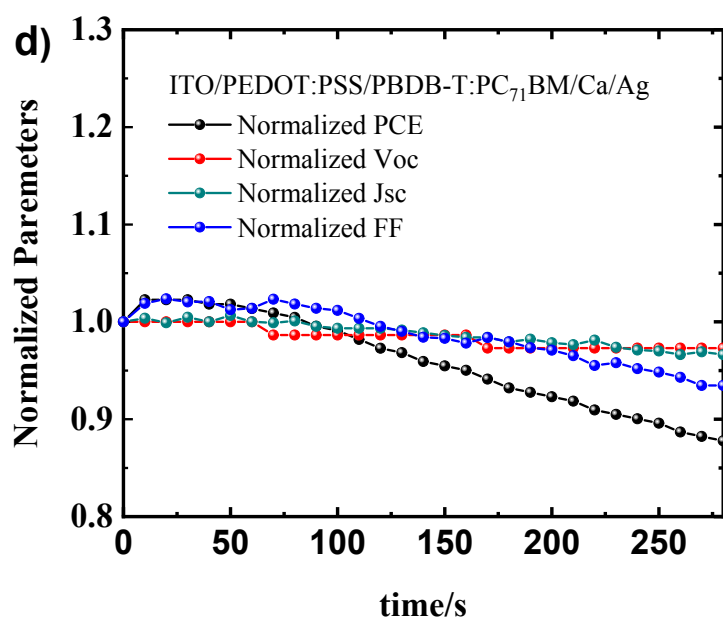

**Fig. S1.** The normalized device performance parameters **(a)** for the PBDB-T:PC<sub>71</sub>BM device and **(b)** the PBDB-T:IT-M device with inverted device structure. **(c)**  $J$ - $V$  characteristics of PBDB-T:IT-M device with the conventional structure upon light-soaking for 0s and 50s. **(d)** The normalized device performance parameters for the PBDB-T:PC<sub>71</sub>BM device with inverted device structure.

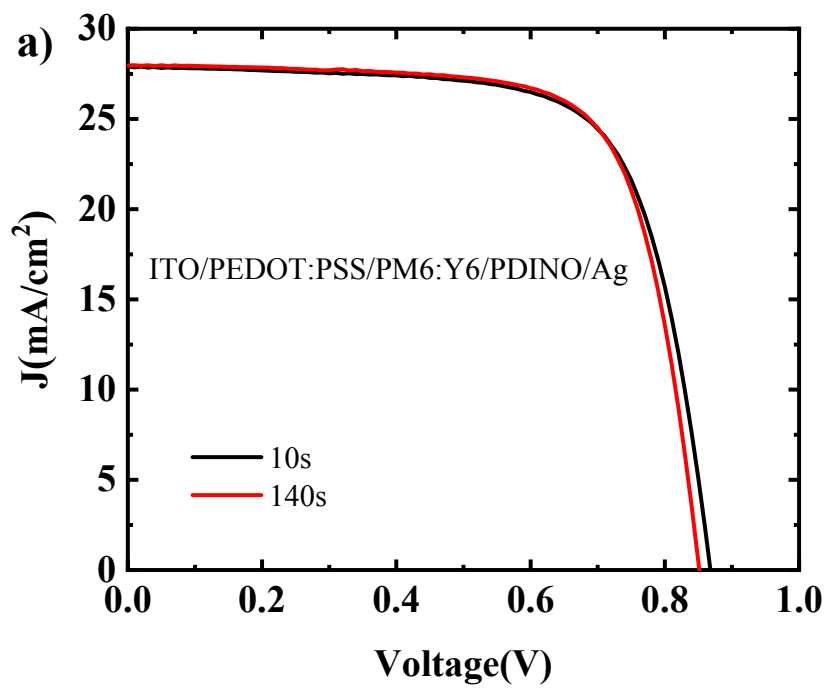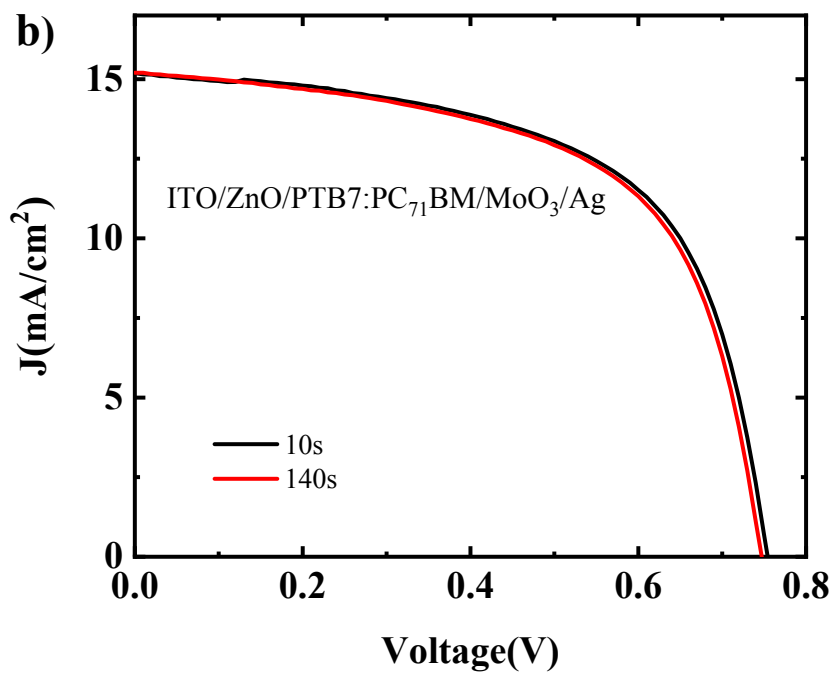

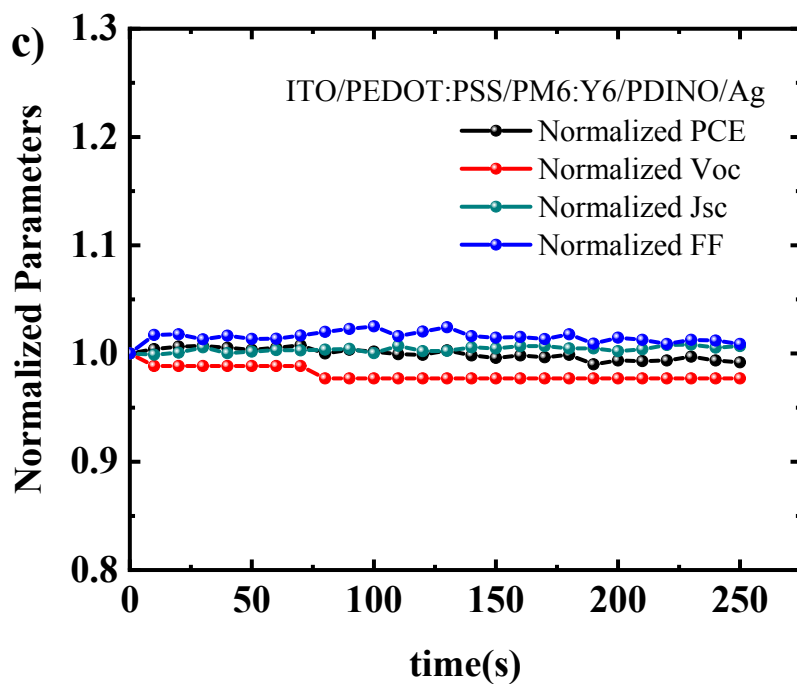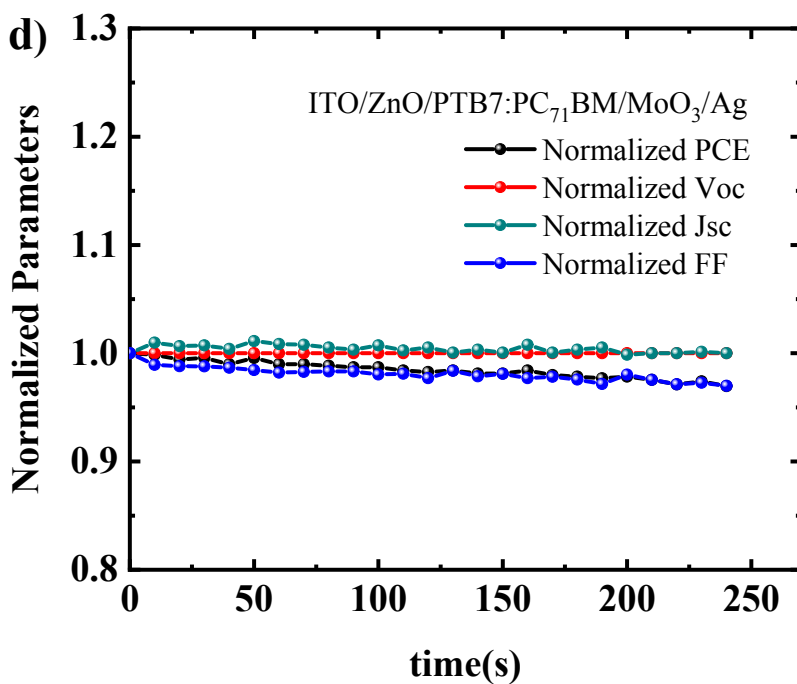

**Fig.S2.** The  $J$ - $V$  characteristics and the normalized device performance parameters (a,c) for the PM6:Y6 device and (b,d) for the PTB7:PC<sub>71</sub>BM device with conventional device structure.



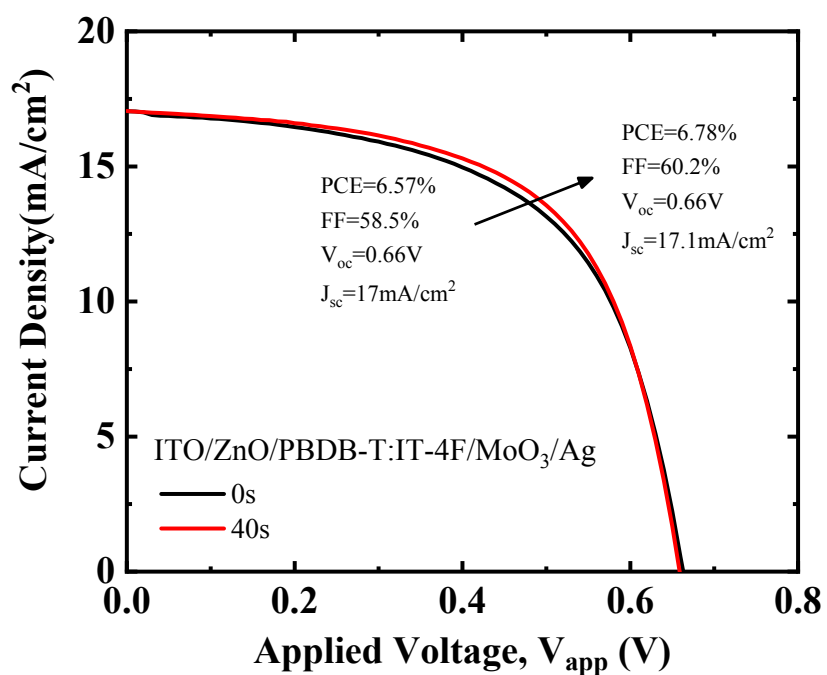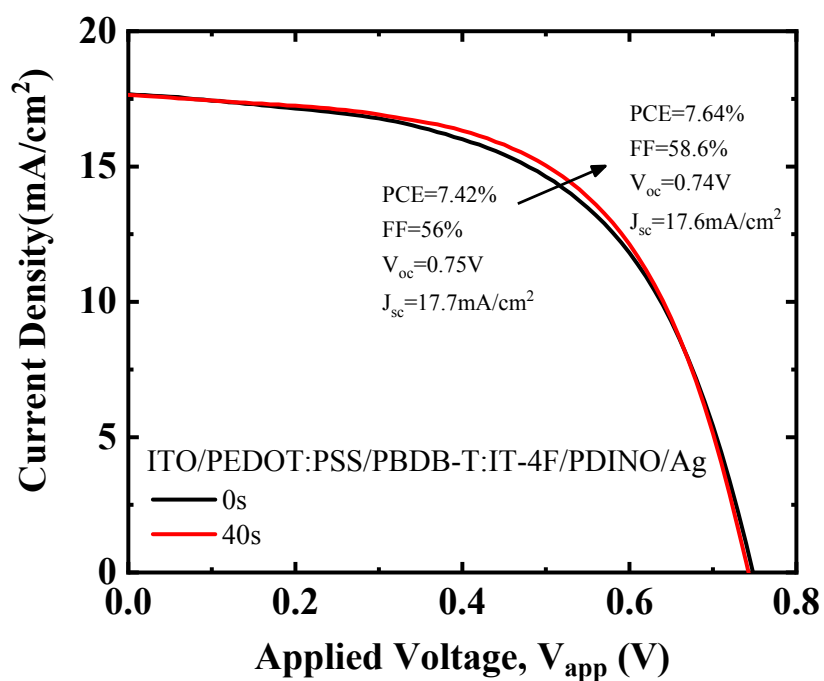

**Fig. S3**  $J$ - $V$  characteristics for the inverted (a) and (b) conventional OSCs based on PBDB-T:IT-4F upon light-soaking for 0s and 40s.

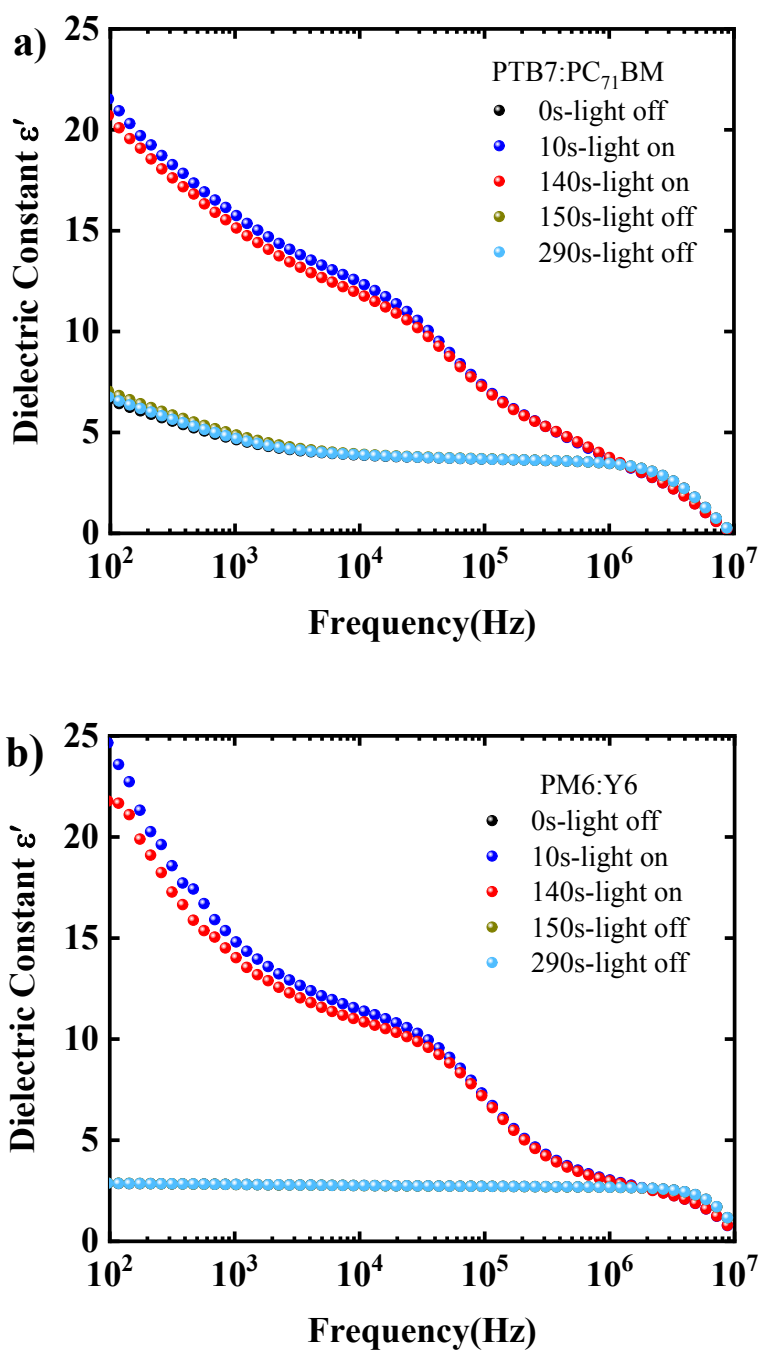

**Fig. S4** The dielectric constants relaxation of PTB7:PC<sub>71</sub>BM (a) and PM6:Y6 (b) device as a function of A.C frequency under different illumination time  $t$ . When  $t=0$ s, device is in the dark. Turn on the light at  $t=1$ s, then we test at  $t=10$ s and  $t=140$ s, and then turn off the light immediately. Then we test again at when  $t=150$ s and  $t=290$ s.

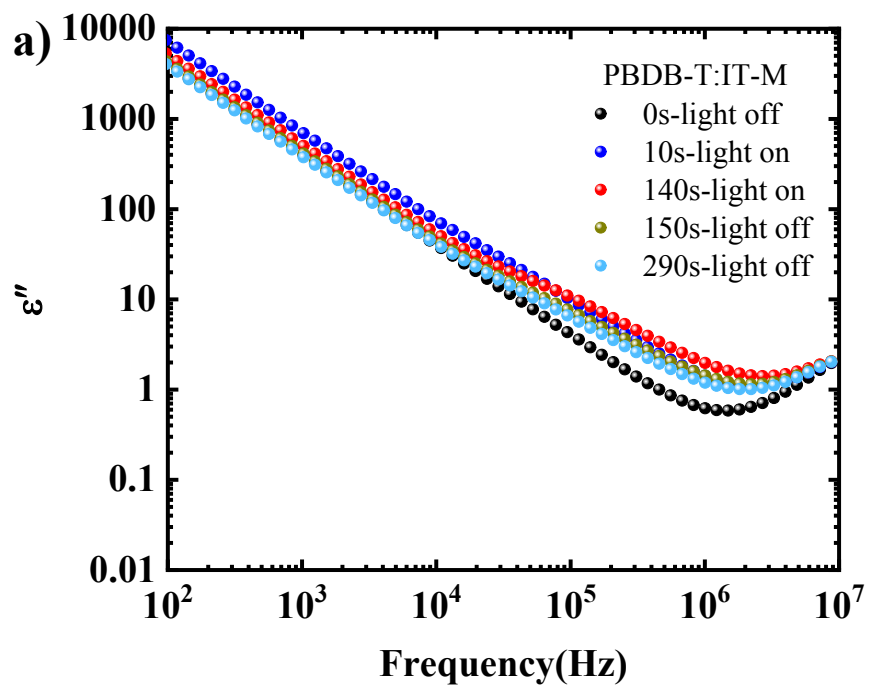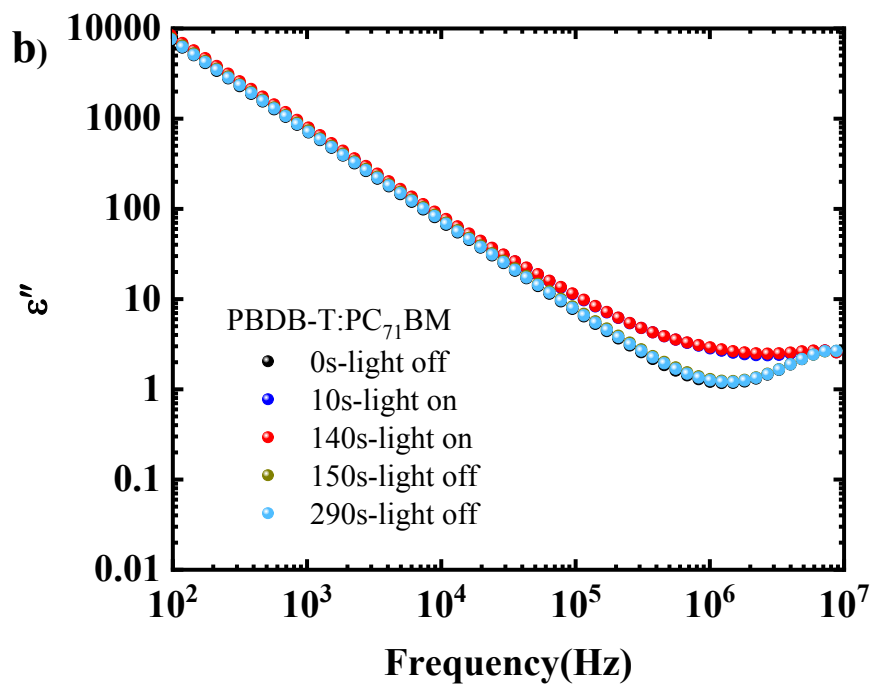

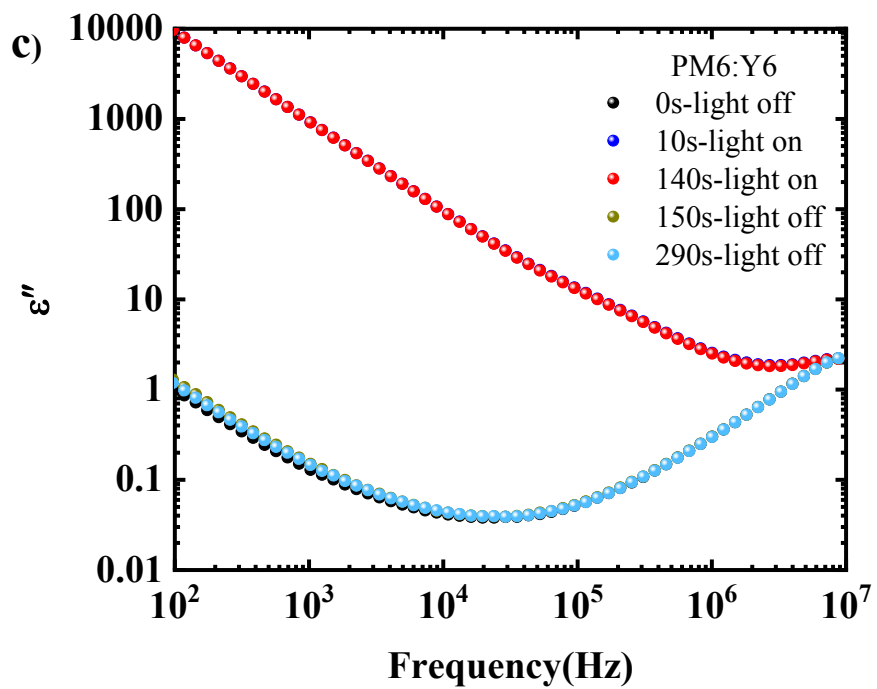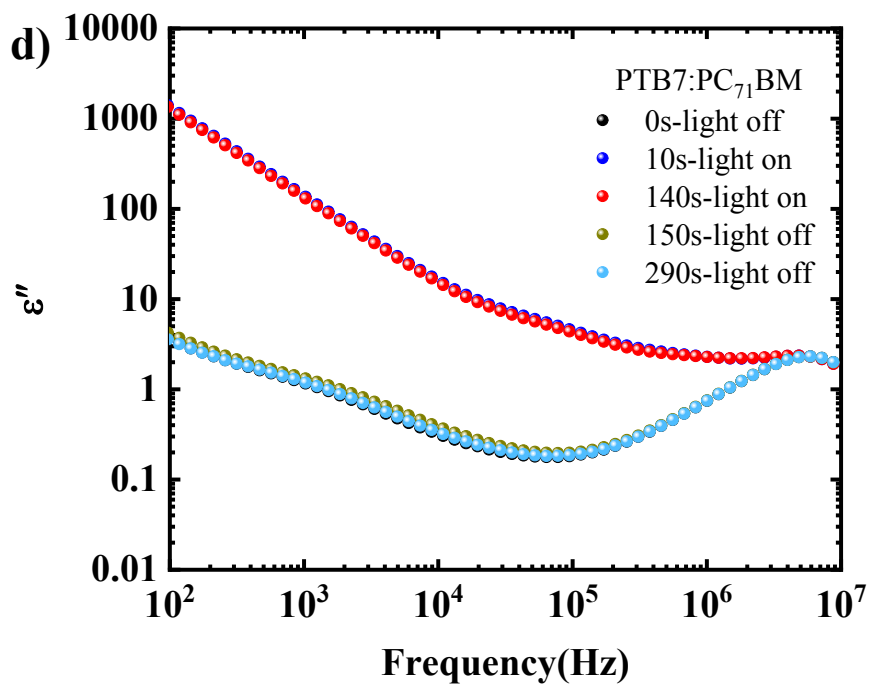

**Fig. S5.** The dielectric loss for the (a) PBDB-T:IT-M, (b) PBDB-T:PC<sub>71</sub>BM, (c) PM6:Y6 devices and (d) the PTB7:PC<sub>71</sub>BM device.

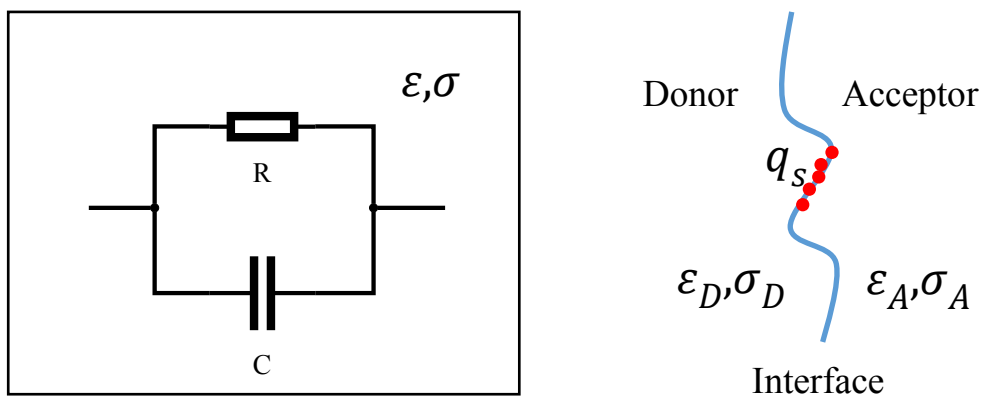

**Fig. S6 (a)** Equivalent circuit of the active layer in the OSCs devices and **(b)** Schematic of Maxwell-Wagner effect.

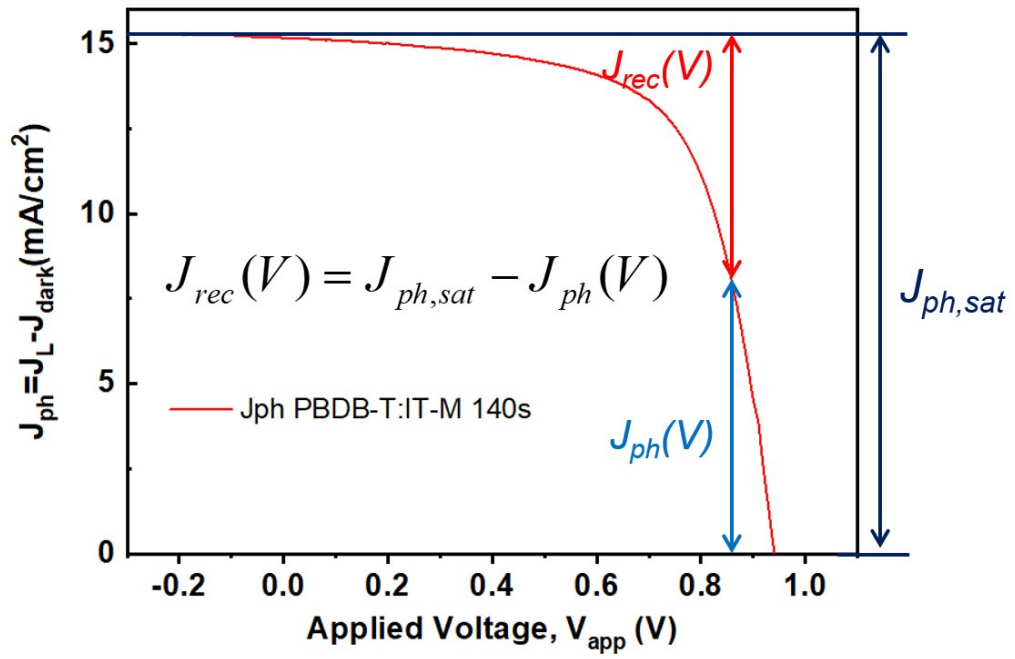

**Fig. S7** Schematic diagram showing the relation about three types of current, including saturation current  $J_{sat}$ , light current  $J_L$  and recombination current  $J_{rec}$
